# Supplementary material for: Comparison of the Effects of Different Cryoprotectants on Stem Cells from Umbilical Cord Blood
Source: Hindawi journal article supplement (doi:10.1155/2016/1396783), 2015-12-07
Supplement: f1 [file 1396783.f1.pdf]

0.35276

0.34311

0.33345

0.32380

0.31415

0.30449

0.29484

0.28518

0.27553

0.00 7.70 15.40 23.10 30.80 38.50 46.20

Time (Hours Elapsed)

Station: 1/B39 From 08/DEC/2013 12:09:20 to 10/DEC/2013 10:21:34

\* Growth Curve

Protocol Start: 08/DEC/2013 12:09:20

o Positivity

Time to Detection: 7.34 Hours

a

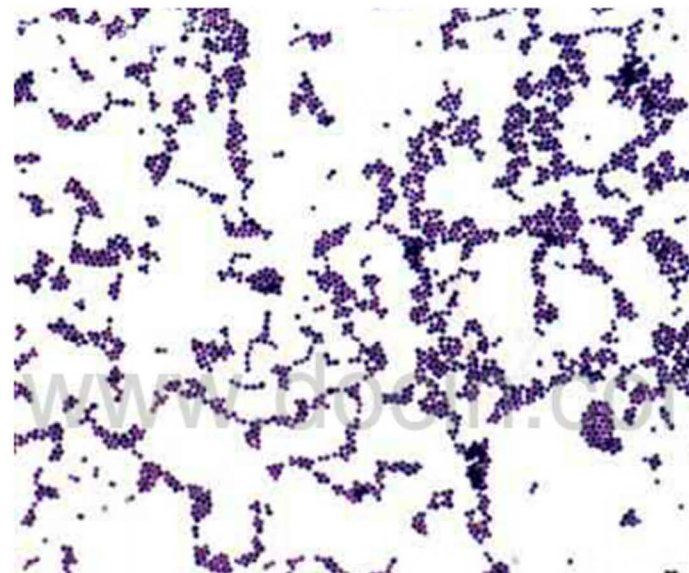

10 × 100

b
